# Supplementary material for: One Health Genomic Surveillance of Escherichia coli Demonstrates Distinct Lineages and Mobile Genetic Elements in Isolates from Humans versus Livestock
Source: PubMed Central journal article supplement (PMC6343043; doi:10.1128/mbio.02693-18), 2019-01-22
Supplement: mBio.02693-18-st002.pdf [file mBio.02693-18-st002.pdf]

**Supplementary Table 2** Distribution by source of the 5 most frequent sequence types (STs), and phylogroup

| ST                | Number (%) of isolates |                   |                   |                           |                          |                | Total<br>(n=1948) |
|-------------------|------------------------|-------------------|-------------------|---------------------------|--------------------------|----------------|-------------------|
|                   | Human<br>(n=1517)      | Chicken<br>(n=84) | Turkey<br>(n=102) | Dairy<br>cattle<br>(n=58) | Beef<br>cattle<br>(n=59) | Pig<br>(n=128) |                   |
| ST 73             | 265 (17)               | 0                 | 0                 | 0                         | 0                        | 0              | 265 (14)          |
| ST 602            | 0                      | 24 (29)           | 0                 | 0                         | 0                        | 0              | 24 (1)            |
| ST 117            | 12 (0.8)               | 6 (7)             | 28 (27)           | 0                         | 0                        | 1 (0.8)        | 47 (2)            |
| ST 2325           | 0                      | 0                 | 0                 | 9 (16)                    | 0                        | 3 (2)          | 12 (0.6)          |
| ST 196            | 0                      | 0                 | 0                 | 0                         | 10 (17)                  | 0              | 10 (0.5)          |
| ST 10             | 40 (3)                 | 17 (20)           | 10 (10)           | 7 (12)                    | 6 (10)                   | 25 (20)        | 105 (5)           |
| <b>Phylogroup</b> |                        |                   |                   |                           |                          |                |                   |
| A                 | 87 (6)                 | 40 (48)           | 34 (33)           | 21 (36)                   | 9 (15)                   | 55 (43)        | 246 (13)          |
| B1                | 69 (5)                 | 31 (37)           | 13 (13)           | 36 (62)                   | 47 (80)                  | 30 (23)        | 226 (12)          |
| B2                | 1026 (68)              | 0                 | 1 (1)             | 0                         | 1 (2)                    | 2 (2)          | 1030 (53)         |
| C                 | 44 (3)                 | 1 (1)             | 0                 | 0                         | 0                        | 10 (8)         | 55 (3)            |
| D                 | 206 (14)               | 2 (2)             | 5 (5)             | 0                         | 1 (2)                    | 8 (6)          | 222 (11)          |
| E                 | 4 (0.3)                | 4 (5)             | 0                 | 1 (2)                     | 1 (2)                    | 6 (5)          | 16 (0.8)          |
| F                 | 80 (5)                 | 6 (7)             | 49 (48)           | 0                         | 0                        | 17 (13)        | 152 (8)           |
| Unknown           | 1 (0.07)               | 0                 | 0                 | 0                         | 0                        | 0              | 1 (0.1)           |

Percentages are rounded to the nearest decimal
